# Supplementary material for: pH-Tuned self-assembly of organic–inorganic hybrids based on different vanadate chains, Zn(ii) ions and flexible ligands: crystallizing in polar and centrosymmetric space group
Source: Royal Society of Chemistry journal article supplement (doi:10.1039/c0ce00260g), 2010-10-01
Supplement: c0ce00260g.pdf [file c0ce00260g.pdf]

**pH-Tuned self-assembly of organic-inorganic hybrids based on different vanadate chains, Zn(II) ions and flexible ligands: crystallizing in polar and centrosymmetric space group**

Jun-Sheng Qin, Dong-Ying Du, Shun-Li Li, Ya-Qian Lan\*, Kui-Zhan Shao, Zhong-Min Su\*

Institute of Functional Material Chemistry; Key Lab of Polyoxometalate Science of Ministry of Education, Faculty of Chemistry, Northeast Normal University, Changchun, 130024, China.

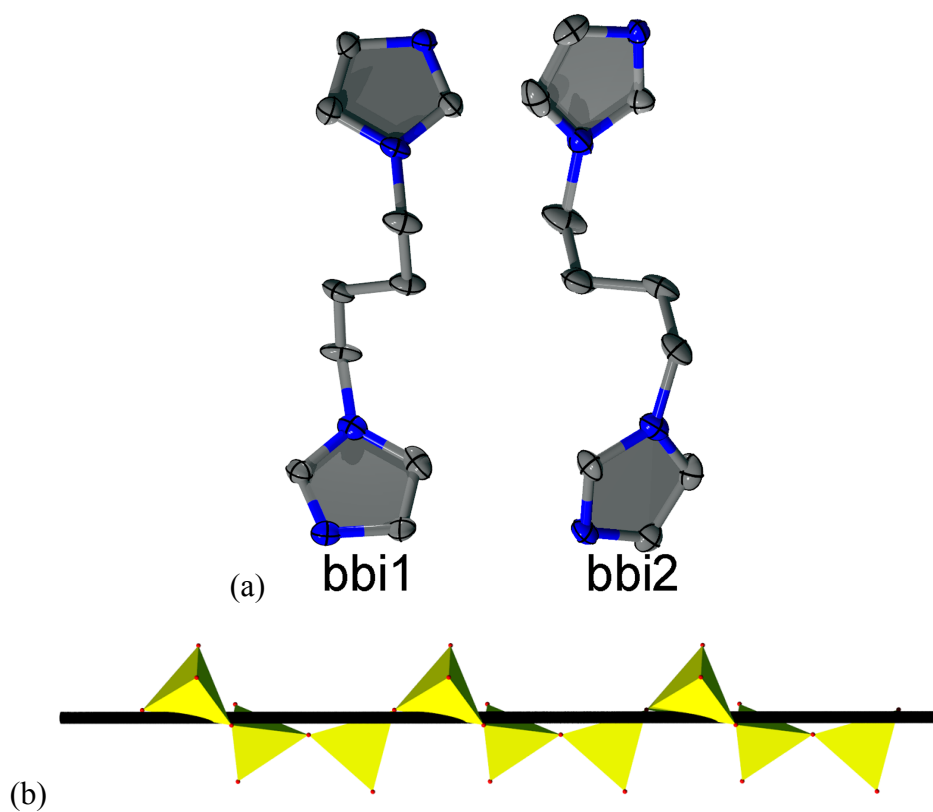

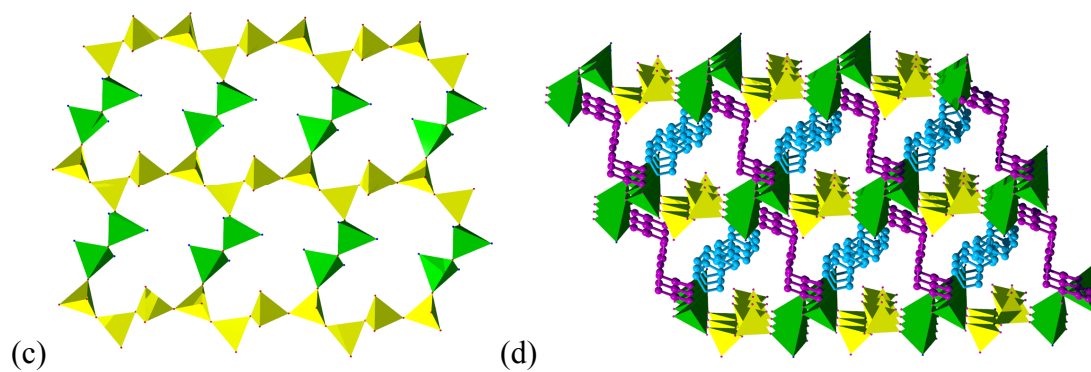

**Figure S1.** (a) Ball and stick representation of two kinds of bbi ligands in **1**. (b) Polyhedral representation of 1D helical chain of  $(V_3O_9)^{3-}$ . (c) Polyhedral representation of the  $[Zn_2(V_3O_9)(OH)]$  sheet. (d) Polyhedral representation of **1**.

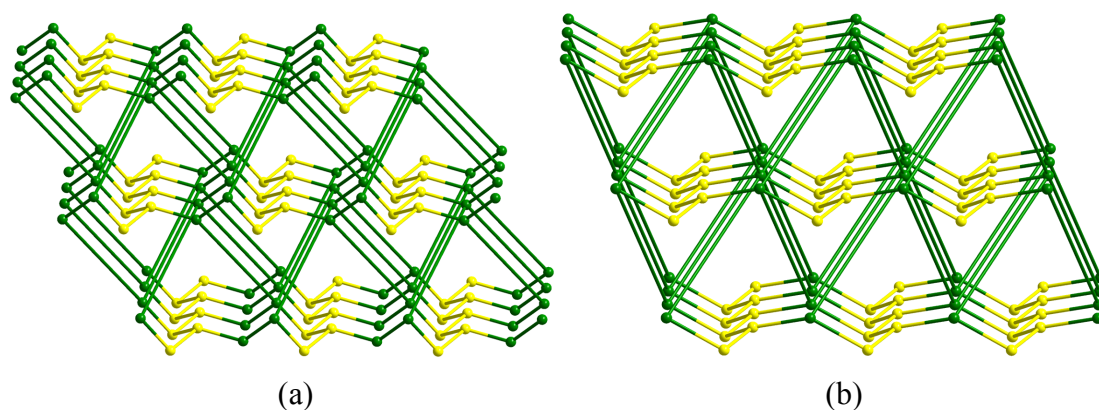

**Figure S2.** (a) Schematic representation of the (3,4)-connected framework with  $(10^3)_2(6^3 \cdot 10^3)_2$  topology of compound **1**. (b) Schematic representation of the (3,6)-connected framework with  $(8^3)_2(4^4 \cdot 6^2 \cdot 8^9)$  topology of compound **1**.

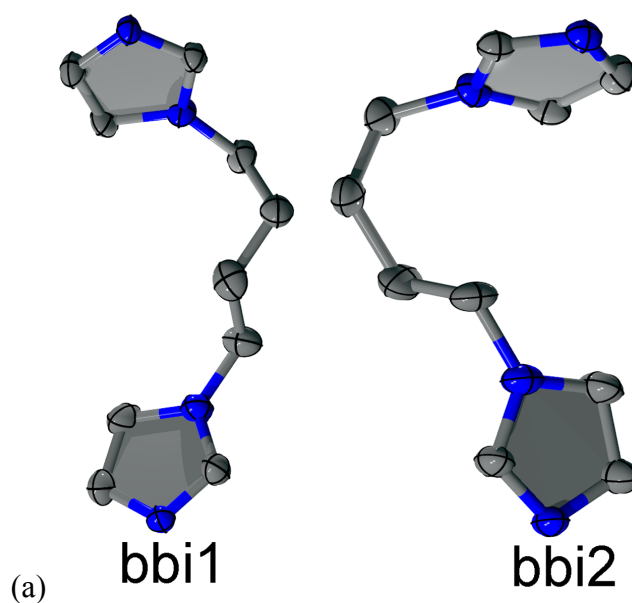

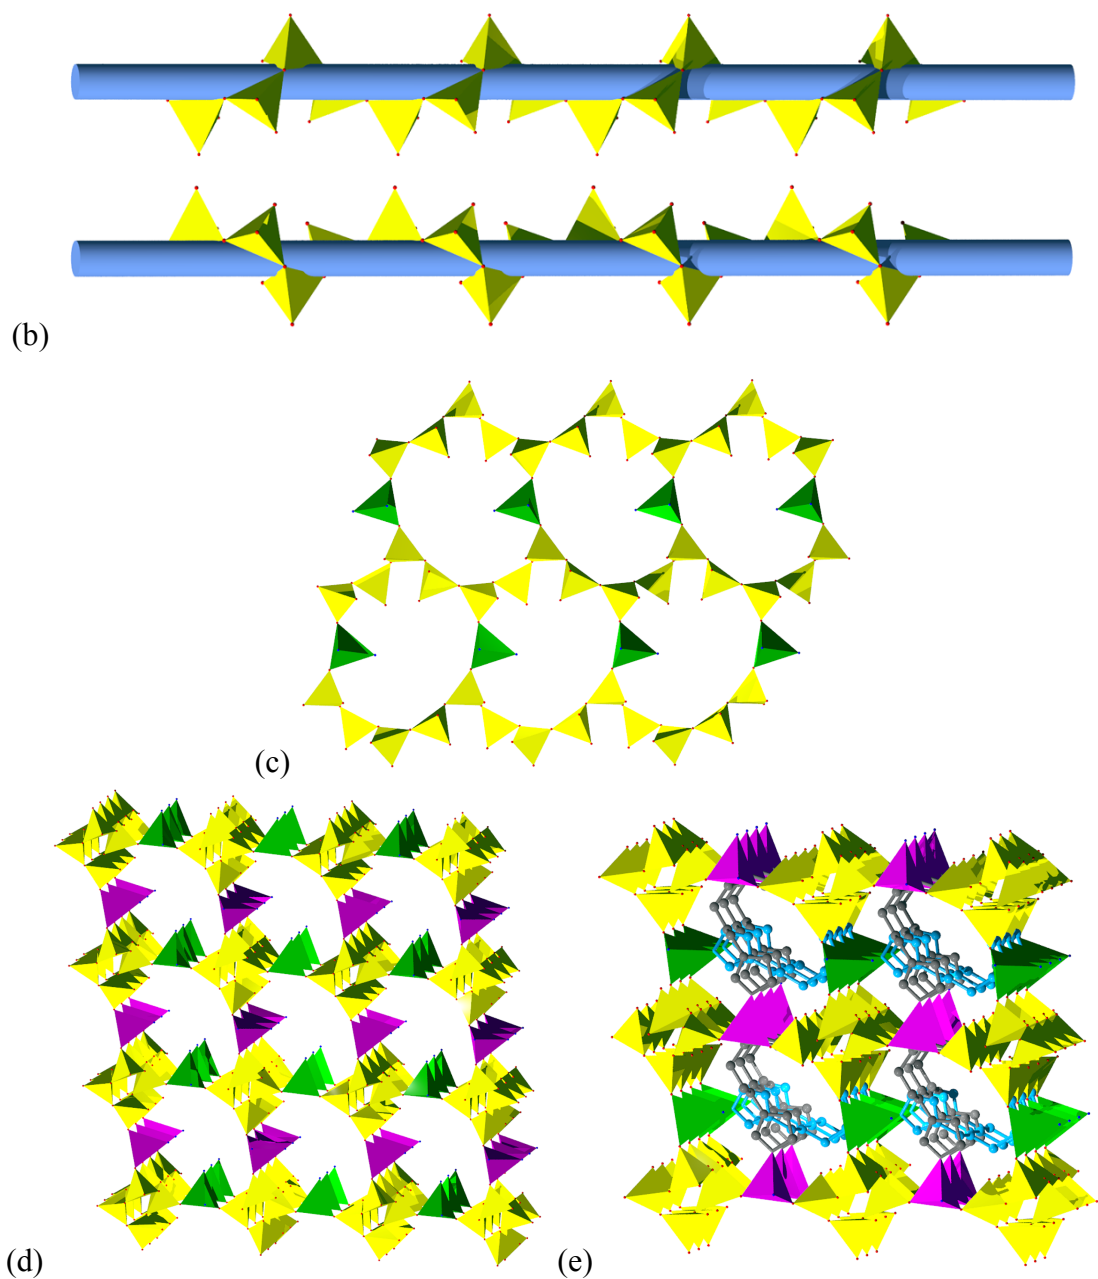

**Figure S3.** (a) Ball and stick representation of two kinds of bbi ligands in **2**. (b) Polyhedral representation of two kinds of 1D helical chains of  $(V_4O_{12})^{4-}$ . (c) Polyhedral representation of the sheet by  $(V_4O_{12})^{4-}$  and Zn1 atoms. (d) Polyhedral representation of 3D inorganic  $[Zn_2(V_4O_{12})]$  framework. (e) Polyhedral representation of **2**.

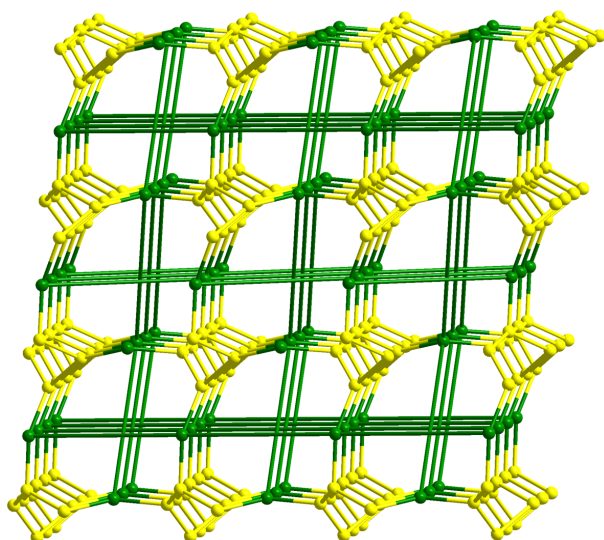

**Figure S4.** Schematic representation of the (3,4)-connected framework with  $(7^2 \cdot 9)_4(7^4 \cdot 9 \cdot 12)(7 \cdot 9^4 \cdot 12)$  topology of compound **2**.

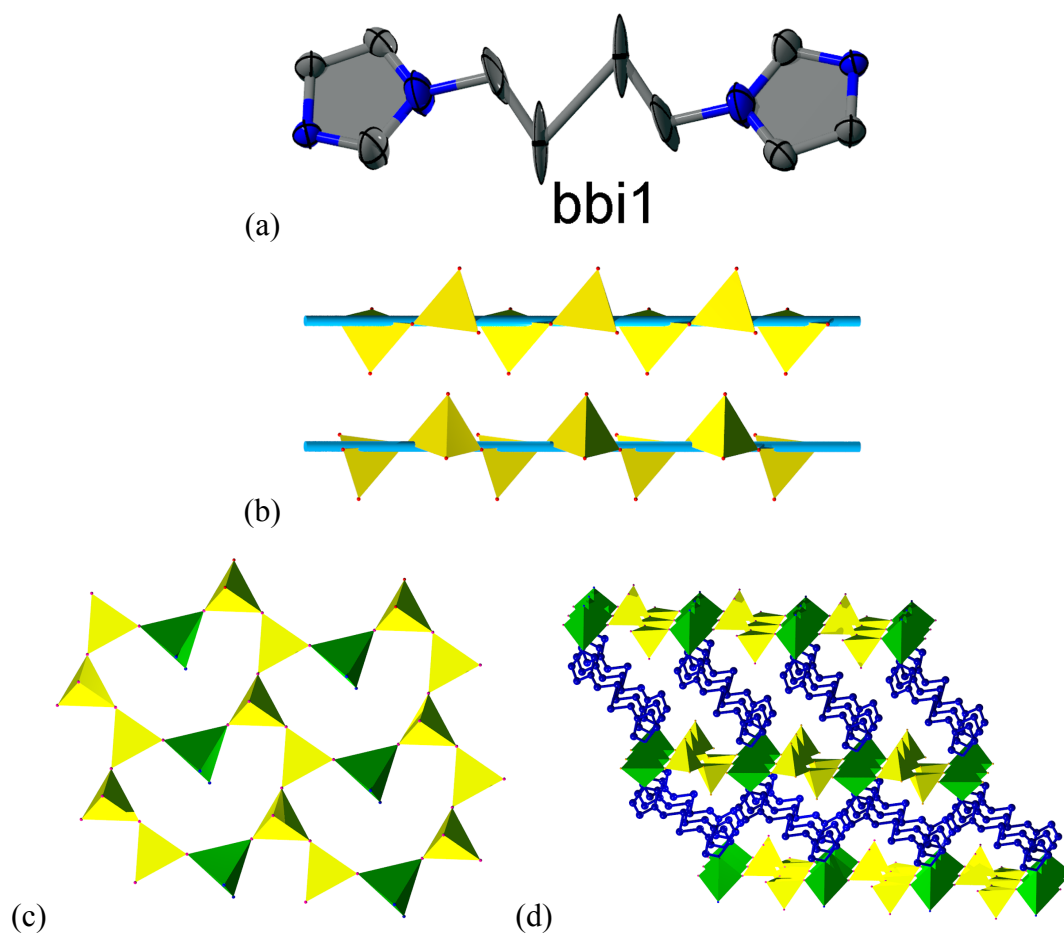

**Figure S5.** (a) Ball and stick representation of bbi ligand in **3**. (b) Polyhedral representation of 1D helical chains of  $(V_2O_6)^{2-}$ . (c) Polyhedral representation of the  $[Zn(V_2O_6)]$  sheet. (d) Polyhedral representation of **3**.

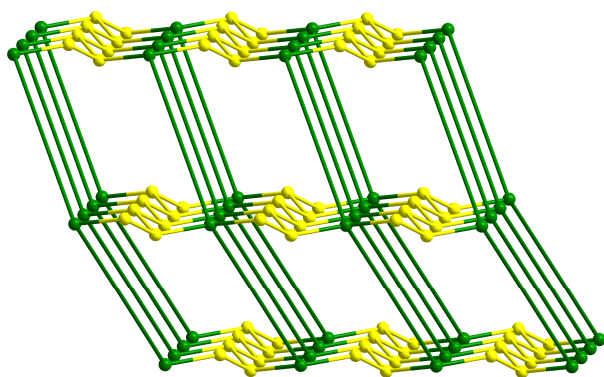

**Figure S6.** Schematic representation of the (3,4)-connected framework with  $(8^2 \cdot 10)(8^5 \cdot 10)$  topology of compound **3**.

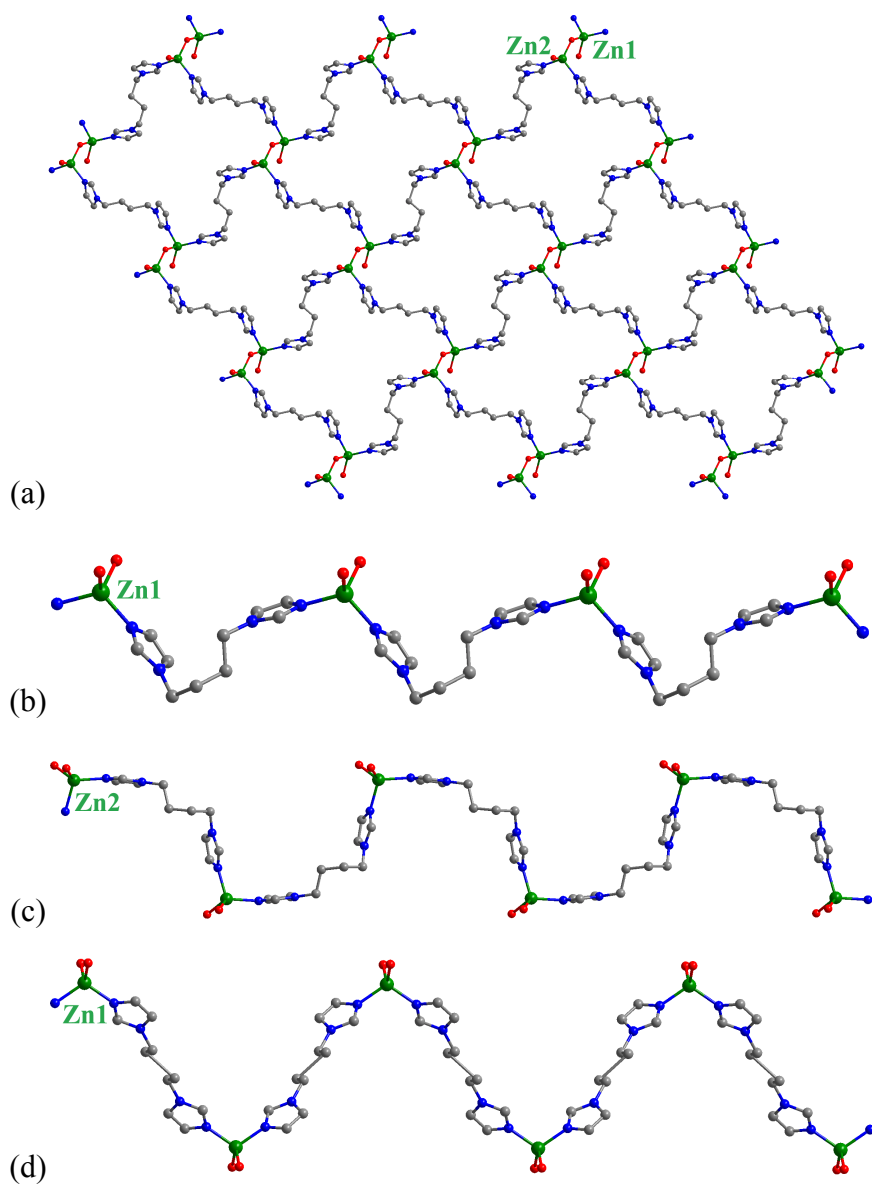

**Figure S7.** The connectivity modes between Zn atoms and bbi ligands in compounds **1** (a), **2** (b) and (c), **3** (d)

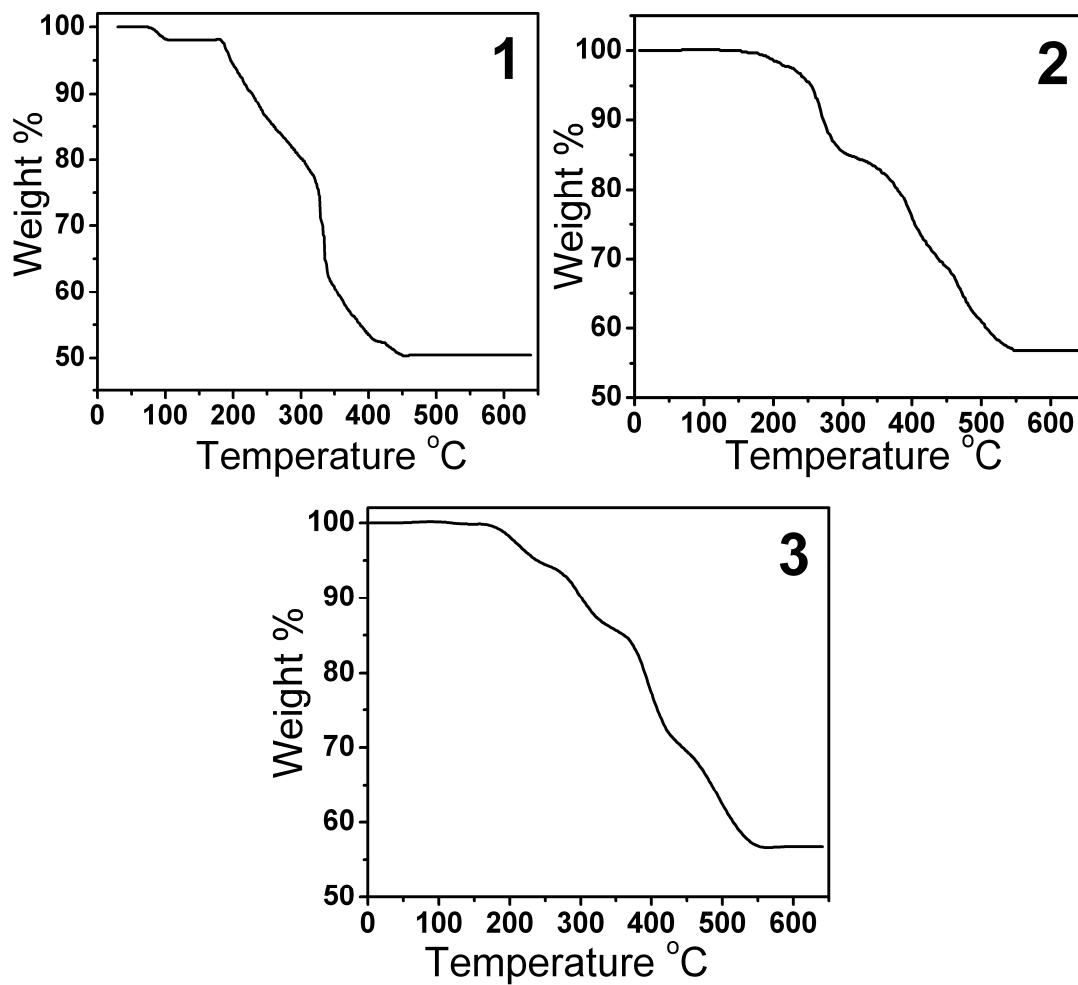

**Figure S8.** The TGA curves of compounds 1 - 3.

**Table S1.** Conformation (B) of bbi (A), Dihedral Angle of Two Imidazole Rings (C) (deg), and Torsion Angles (D) (deg) in compounds **1-3**

|          | A    | B   | C    | D              |                 |                |
|----------|------|-----|------|----------------|-----------------|----------------|
| <b>1</b> | bbi1 | GTG | 1.2  | N2-C4-C5-C6    | C4-C5-C6-C7     | C5-C6-C7-N8    |
|          |      |     |      | 60.76          | -179.47         | -64.90         |
|          | bbi2 | GTG | 4.9  | N4-C14-C15-C16 | C14-C15-C16-C17 | C15-C16-C17-N6 |
|          |      |     |      | 58.90          | -178.19         | -66.00         |
| <b>2</b> | bbi1 | TGG | 71.9 | N2-C4-C5-C6    | C4-C5-C6-C7     | C5-C6-C7-N3    |
|          |      |     |      | -178.40        | 84.90           | 75.61          |
|          | bbi2 | TGG | 64.9 | N6-C14-C15-C16 | C14-C15-C16-C17 | C15-C16-C17-N7 |
|          |      |     |      | 179.78         | 90.69           | -62.22         |
| <b>3</b> | bbi1 | TTT | 0    | N2-C4-C5-C5'   | C4-C5-C5'-C4'   | C5-C5'-C4'-N2  |
|          |      |     |      | 169.22         | 180             | -169.22        |
